# Supplementary material for: Monitoring gestational diabetes at the point-of-care via dual glycated albumin lateral flow assays in conjunction with a handheld reader
Source: Royal Society of Chemistry journal article supplement (doi:10.1039/d2an01238c), 2022-01-01
Supplement: d2an01238c1.pdf [file d2an01238c1.pdf]

## Supplementary Information

Table S1: Aptamer sequences

|                     |                                                                             |
|---------------------|-----------------------------------------------------------------------------|
| GA aptamer [1]      | 5'-/5ThioMC6-D//iSp18/GGTGCGGTTTCGTGCGGTTGTAGTACTCGTGGCCGATAGAGGTAGTTTCG-3' |
| HSA aptamer 1 [2]   | 5'-/5BiotinTEG/GTCTCAGCTACCTTACCGTATGTGGCCCAAAGCGTCTGGATGGCTATGAA-3'        |
| HSA aptamer 2 [2]   | 5'-/5hioMC6-D//iSp18/AATTGGAGTGGGGGGCCACGGTTAAATCATTTCGGTGATTGA-3'          |
| GA control aptamer  | 5'-/5BiotinTEG/CGAAACTAC CTCTATCGGCCACGAGTACTACAACCGCACGAACCGCACC-3'        |
| HSA control aptamer | 5'-/5BiotinTEG/TCAATCACCGAATGATTTAACCGTGGCCCCCACTCCAATT-3'                  |

Table S2: Regression parameters:

|                | Glycated Albumin | Serum Albumin |
|----------------|------------------|---------------|
| Slope          | 4.503            | 1.694         |
| Intercept      | 37.94            | 41.05         |
| R <sup>2</sup> | 0.9644           | 0.9206        |

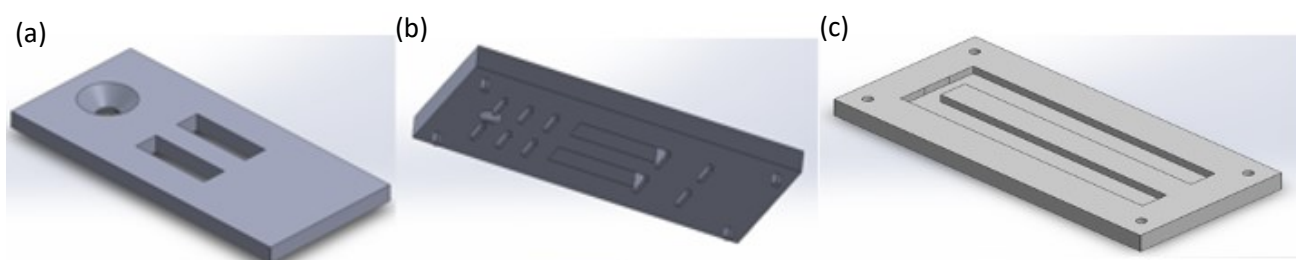

Fig. S1 Dual assay cartridge: top (a) top view; (b) bottom view; (c) cartridge bottom

### References:

- [1] C. Apiwat *et al.*, "Graphene based aptasensor for glycated albumin in diabetes mellitus diagnosis and monitoring," *Biosensors and Bioelectronics*, vol. 82, pp. 140–145, 2016
- [2] M. Takenaka, Y. Okumura, T. Amino, Y. Miyachi, C. Ogino, and A. Kondo, "DNA-duplex linker for AFM-SELEX of DNA aptamer against human serum albumin," *Bioorganic and Medicinal Chemistry Letters*, vol. 27, no. 4, pp. 954–957, 2017
